# Supplementary material for: Hub Genes and Key Pathway Identification in Colorectal Cancer Based on Bioinformatic Analysis
Source: Hindawi journal article supplement (doi:10.1155/2019/1545680), 2019-11-06
Supplement: f1 [file 1545680.f1.pdf]

Supplementary Figures

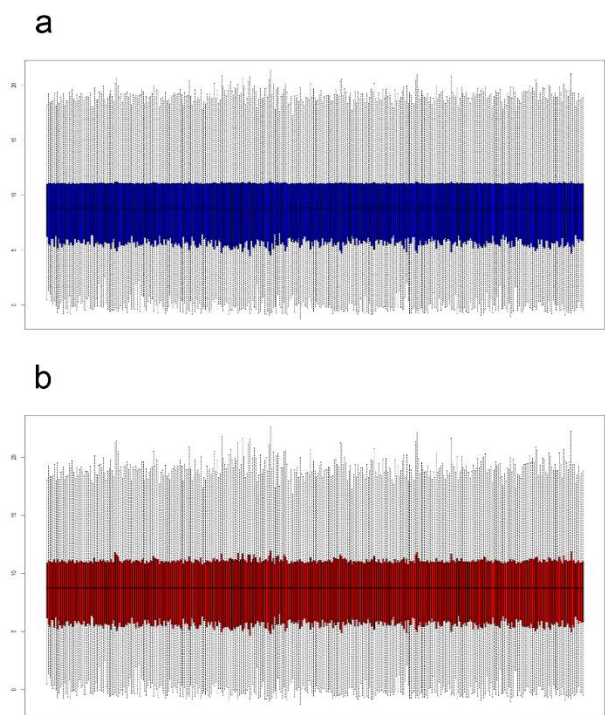

Supplementary Figure 1. Boxplot of the distribution of each sample in GSE87211. NormalizeBetweenArrays function in limma package was used for normalization. (a) The boxplot before normalization, (b) The normalized boxplot.

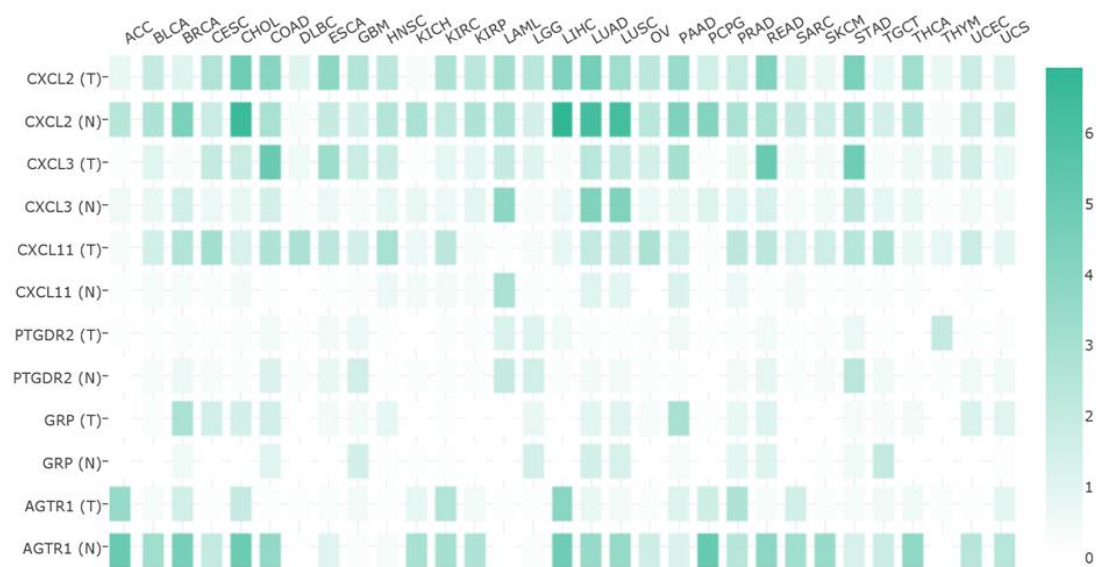

Supplementary Figure 2. The RNA expression level of six hub genes in various cancer in the TCGA dataset analyzed by GEPIA. T indicates tumor, and N indicates normal.
